# Supplementary material for: Systematic Transcriptome Analysis of Synovial Sarcoma Reveals Novel Transcriptional And Post-Transcriptional Abnormalities
Source: Research Square preprint supplement (doi:10.21203/rs.3.rs-852122/v1), 2021-09-16
Supplement: Supplementary file 1 [file f51977dff06209282b5839d4.pdf]

|                                                                                                                                                                                                                                                                                                                                                                                                                                                                                                                                                                                                                                                                                                                                                                                                                |                                         |                           |                        |                                       |                |            |
|----------------------------------------------------------------------------------------------------------------------------------------------------------------------------------------------------------------------------------------------------------------------------------------------------------------------------------------------------------------------------------------------------------------------------------------------------------------------------------------------------------------------------------------------------------------------------------------------------------------------------------------------------------------------------------------------------------------------------------------------------------------------------------------------------------------|-----------------------------------------|---------------------------|------------------------|---------------------------------------|----------------|------------|
| Patient ID:<br>440413                                                                                                                                                                                                                                                                                                                                                                                                                                                                                                                                                                                                                                                                                                                                                                                          | Departments:<br>Laparoscopic<br>surgery | Inpatient<br>ward:<br>Six | Bed<br>number:<br>666n | Date of<br>examination:<br>2015-05-20 | Sex:<br>Female | Age:<br>26 |
| Musculoskeletal tumor of the right thigh and pubic bone Specimen                                                                                                                                                                                                                                                                                                                                                                                                                                                                                                                                                                                                                                                                                                                                               |                                         |                           |                        |                                       |                |            |
| <p><b>Top table:</b></p> <p>(Right thigh root) high-grade spindle cell sarcoma, tumor size 12*10.5*10cm.</p> <p>No involvement of specimen cut edges (tumor 3 cm from skin, 1.2 cm from the base cut edge, 1.5cm and 1.7cm from both long axis cut edges, 1.2cm and 0.3cm from both short axis cut edges).</p> <p>Tumor involvement is seen in the pubic bone.</p> <p>Additional report:</p> <p>(Right thigh root) Synovial sarcoma, SS</p> <p>Immunohistochemical marker results (HI15-7989):</p> <p>Tumor cell: AE1/AE3+, BCL-2+, CD34-, CD99+, EMA+, Ki-67+ approximately 10%, S-100-.</p> <p>Molecular pathology test results (MP2015-2763): FISH method testing t(18q11.2)(SYT): (+).</p> <p>Presence of SYT gene-associated ectopic. (&gt;50% Red-green segregated signals were seen in tumor cells)</p> |                                         |                           |                        |                                       |                |            |
| <p><b>Bottom table:</b></p> <p>Items sent for testing: SYT quality control: Sample size: appropriate.</p>                                                                                                                                                                                                                                                                                                                                                                                                                                                                                                                                                                                                                                                                                                      |                                         |                           |                        |                                       |                |            |

Control subjects: Conformity test results: FISH method testing t(18q11.2)(SYT): (+). Presence of SYT gene-associated ectopic. (>50% Red-green segregated signals were seen in tumor cells)  
Description of lesion: Right thigh spindle cell sarcoma (original pathology number:2015-17370)

|                                                                                                                                                                                                                                                                                                                                                                                                                                                                                                                                                                                                      |           |         |            |           |              |      |                          |            |
|------------------------------------------------------------------------------------------------------------------------------------------------------------------------------------------------------------------------------------------------------------------------------------------------------------------------------------------------------------------------------------------------------------------------------------------------------------------------------------------------------------------------------------------------------------------------------------------------------|-----------|---------|------------|-----------|--------------|------|--------------------------|------------|
| 443564                                                                                                                                                                                                                                                                                                                                                                                                                                                                                                                                                                                               | 科室:<br>性科 | 门诊<br>男 | 病区:<br>年龄: | 六病区<br>18 | 床号:          | 667n | 检查日期                     | 2015/07/27 |
| 右足部肿块+第4、5跖骨标本<br>足部腱鞘巨细胞瘤                                                                                                                                                                                                                                                                                                                                                                                                                                                                                                                                                                           |           |         |            |           |              |      |                          |            |
| 【正式报告】<br>标本的类型: 左足部软组织肿块+第4、5跖骨标本<br>肿瘤的解剖部位: 足背外侧、足底外侧、第4、5跖骨<br>肿瘤的深度: 肌肉间、骨髓质<br>原发性/复发性: 复发性<br>组织学类型 (WHO分类): 滑膜肉瘤, 双相型 (synovial sarcoma, biphasic)<br>ICD-O编码: 9043/3<br>组织学分级 (FNCLCC): G3<br>肿瘤大小: 6.0×3.5×2.0cm<br>坏死: 无<br>脉管侵犯: (+) 神经侵犯: (-)<br>切缘情况:<br>前缘长轴切缘 (紧邻肿瘤): (部分+)<br>前缘短轴切缘 (分别距离肿瘤1.0cm和0.5cm): (-)<br>表面切缘 (距离肿瘤1.0cm): (-)<br>基底切缘 (距离肿瘤1.8cm): (-)<br>免疫组化 (H115-12566)<br>瘤细胞: AE1/AE3 (部分+), CD99 (弱+), BCL-2 (+), calponin (-), Desmin (-), EMA (-), KP-1 (-)<br>分子病理 (WP2015-4423) 检测结果:<br>FISH法检测: (13q11.2) (STT): (-), 即无STT基因相关易位。<br>(注: <10%肿瘤细胞内可见红绿分离信号。) |           |         |            |           |              |      |                          |            |
| 报告医生:<br>复诊医生:                                                                                                                                                                                                                                                                                                                                                                                                                                                                                                                                                                                       |           |         |            |           | 蒋振<br>王坚、刘绮颖 |      | 报告日期:<br>复诊日期:           |            |
|                                                                                                                                                                                                                                                                                                                                                                                                                                                                                                                                                                                                      |           |         |            |           |              |      | 2015/07/27<br>2015/07/27 |            |

报告编号: MP2015-04423

|                                                                                                                                                 |            |           |            |           |          |      |       |            |
|-------------------------------------------------------------------------------------------------------------------------------------------------|------------|-----------|------------|-----------|----------|------|-------|------------|
| 643564                                                                                                                                          | 科室:<br>性别: | 泌尿外科<br>男 | 病区:<br>年龄: | 六病区<br>18 | 床号:      | 667n | 检查日期  | 2015/07/23 |
| 右足部肿块+第4、5跖骨标本<br>足部腱鞘巨细胞瘤                                                                                                                      |            |           |            |           |          |      |       |            |
| 送检项目:SYT质量控制:样本量:合适<br>信 号:合格<br>对 照:合格检测结果:FISH法检测(18q11.2)(SYT):(-),即无SYT基因相关易位。<br>(注:<10%肿瘤细胞内可见红绿分离信号。)<br>病变描述:(右足部)梭形细胞肿瘤癌病理号:2015-28251 |            |           |            |           |          |      |       |            |
| 报告医生:                                                                                                                                           |            |           |            |           | 周晓燕, 柏乾明 |      | 报告日期: | 2015/07/23 |
| 复诊医生:                                                                                                                                           |            |           |            |           |          |      | 复诊日期: | 2015/07/23 |

|                       |                                         |                           |                        |                                       |              |            |
|-----------------------|-----------------------------------------|---------------------------|------------------------|---------------------------------------|--------------|------------|
| Patient ID:<br>443564 | Departments:<br>Laparoscopic<br>surgery | Inpatient<br>ward:<br>Six | Bed<br>number:<br>667n | Date of<br>examination:<br>2015-07-27 | Sex:<br>Male | Age:<br>18 |
|-----------------------|-----------------------------------------|---------------------------|------------------------|---------------------------------------|--------------|------------|

Soft tissue lumps in the left foot and the 4th and 5th metatarsal specimen.

**Top table:**  
[Official report]

Specimen type: Soft tissue lumps in the left foot and the 4th and 5th metatarsal specimen.

Anatomical site of the tumor: Lateral dorsum of the foot, lateral sole, the 4th and 5th metatarsal

Depth of tumor location: Muscles and bone marrow

Primary or recurrent: Recurrent.

Histological type (WHO classification): Synovial sarcoma, biphasic

ICD-0 code:9043/3

Histological grading (FNCLCC): G3

Tumor size: 6.0\*3.5\*2.0cm

Necrosis: none

Invasion of blood vessels: (+). Invasion of nerves:(-).

|                                                                                                                                                                                                                                                                                                                                                                                                                                                                                                                                                                                                                                                            |
|------------------------------------------------------------------------------------------------------------------------------------------------------------------------------------------------------------------------------------------------------------------------------------------------------------------------------------------------------------------------------------------------------------------------------------------------------------------------------------------------------------------------------------------------------------------------------------------------------------------------------------------------------------|
| Cutting edge status:<br>Both long axis cut edges (Immediately adjacent to the tumor): (Partial margin+)<br>Both short axis cut edges (1.0cm and 0.5cm from the tumor, respectively): (-)<br>Surface cutting edge distance from tumor: 1.0cm (-)<br>Base cut edge distance from tumor:1.8cm (+)<br>Immunohistochemical marker results (HI15-12566):<br>Tumor cell: AE1/AE3(partial+), CD99(week+), BCL-2(+), calponin(-), Desmin(-), EMA(-), KP-1(-).<br>Molecular pathology test results (MP2015-4423): FISH method testing t(18q11.2)(SYT): (-), No presence of SYT gene-associated ectopic. (<10% Red-green segregated signals were seen in tumor cells) |
| <b>Bottom table:</b><br>Items sent for testing: SYT quality control: Sample size: appropriate.<br>Signal: qualified<br>Control subjects: Conformity test results: FISH method testing t(18q11.2)(SYT): (-), No presence of SYT gene-associated ectopic. (<10% Red-green segregated signals were seen in tumor cells)<br>Description of lesion: Right foot spindle cell sarcoma (original pathology number:2015-28251)                                                                                                                                                                                                                                      |

Patient ID: No.3:

|                                                                                                                                                                                                                                                                                                                                                                                                                                                                                                                                                                                                                                                                                                                                                                    |            |          |            |            |                |           |                    |                          |
|--------------------------------------------------------------------------------------------------------------------------------------------------------------------------------------------------------------------------------------------------------------------------------------------------------------------------------------------------------------------------------------------------------------------------------------------------------------------------------------------------------------------------------------------------------------------------------------------------------------------------------------------------------------------------------------------------------------------------------------------------------------------|------------|----------|------------|------------|----------------|-----------|--------------------|--------------------------|
| 460334                                                                                                                                                                                                                                                                                                                                                                                                                                                                                                                                                                                                                                                                                                                                                             | 科室:<br>性别: | 腰外科<br>男 | 病区:<br>年龄: | 十八病区<br>37 | 床号:            | 18*1n     | 检查日期               | 2015/11/17               |
| 左腹股沟软组织骨骼肌肿瘤切除标本<br>左大腿滑膜肉瘤                                                                                                                                                                                                                                                                                                                                                                                                                                                                                                                                                                                                                                                                                                                                        |            |          |            |            |                |           |                    |                          |
| <p>病理诊断:<br/>标本的类型: 左腹股沟肿瘤切除标本<br/>肿瘤的解剖部位: 左腹股沟<br/>肿瘤的深度: 皮下脂肪和肌肉间<br/>原发性/复发性: 复发性<br/>组织学类型 (WHO分类): 梭形细胞肿瘤, 结合镜下形态及病史, 首先考虑双相型滑膜肉瘤 (biphasic synovial sarcoma, SS), 正在加做免疫组化和分子检测进一步证实。<br/>ICD-O编码: 9043/3<br/>组织学分级 (FNCLCC): G3<br/>肿瘤大小: 8.5×6×6cm<br/>环切: 无<br/>脉管侵犯: (-) 神经侵犯: (-)<br/>切缘情况:<br/>前侧短轴切缘 (距肿瘤1.5cm和5.5cm): (-)<br/>窄等一側长轴切缘<br/>另一側长轴切缘 (距肿瘤1.5cm): (-)<br/>表面切缘 (距肿瘤3cm): (-)<br/>基底切缘 (距肿瘤&lt;1mm): (-)<br/>备注: 本例正加做免疫组化和分子病理检测予以证实。<br/>补充报告:<br/>(左腹股沟) 双相型滑膜肉瘤 (biphasic synovial sarcoma)。<br/>免疫组化结果 (HI15-20175):<br/>肿瘤细胞AE1/AE3 (+), CAM5.2 (+), EMA (+), CD99 (+), BCL-2 (+), calponin (+), CD34 (-), Ki-67 (+, 30%)。<br/>分子病理检测结果 (MP2015-07113): FISH法检测t (18q11.2) (SYT): (+), 即有SYT基因相关易位。(注: &gt;80%肿瘤细胞内可见红绿分离信号。)</p> |            |          |            |            |                |           |                    |                          |
|                                                                                                                                                                                                                                                                                                                                                                                                                                                                                                                                                                                                                                                                                                                                                                    |            |          |            |            | 报告医生:<br>复诊医生: | 曾元凤<br>喻林 | 报告日期:<br>复诊日期:     | 2015/11/17<br>2015/11/17 |
| 复旦大学附属肿瘤医院病理报告                                                                                                                                                                                                                                                                                                                                                                                                                                                                                                                                                                                                                                                                                                                                                     |            |          |            |            |                |           |                    |                          |
|                                                                                                                                                                                                                                                                                                                                                                                                                                                                                                                                                                                                                                                                                                                                                                    |            |          |            |            |                |           | 报告编号: MP2015-07113 |                          |
| 460334                                                                                                                                                                                                                                                                                                                                                                                                                                                                                                                                                                                                                                                                                                                                                             | 科室:<br>性别: | 腰外科<br>男 | 病区:<br>年龄: | 十八病区<br>37 | 床号:            | 18*1n     | 检查日期               | 2015/11/17               |
| 左腹股沟软组织骨骼肌肿瘤切除标本<br>左大腿滑膜肉瘤                                                                                                                                                                                                                                                                                                                                                                                                                                                                                                                                                                                                                                                                                                                                        |            |          |            |            |                |           |                    |                          |
| <p>送检项目: SYT质量控制: 样本量: 合适<br/>信号: 合格<br/>对照: 合格检测结果: FISH法检测t (18q11.2) (SYT): (+), 即有SYT基因相关易位。<br/>(注: &gt;80%肿瘤细胞内可见红绿分离信号。)<br/>病史描述: (左大腿) 梭形细胞肿瘤原病理号: 2015-46150B</p>                                                                                                                                                                                                                                                                                                                                                                                                                                                                                                                                                                                        |            |          |            |            |                |           |                    |                          |
|                                                                                                                                                                                                                                                                                                                                                                                                                                                                                                                                                                                                                                                                                                                                                                    |            |          |            |            | 报告医生:<br>复诊医生: | 柏乾明       | 报告日期:<br>复诊日期:     | 2015/11/17<br>2015/11/17 |

Translation: (Chinese -> English)

|                       |                                         |                                |                         |                                       |              |            |
|-----------------------|-----------------------------------------|--------------------------------|-------------------------|---------------------------------------|--------------|------------|
| Patient ID:<br>460334 | Departments:<br>Laparoscopic<br>surgery | Inpatient<br>ward:<br>Eighteen | Bed<br>number:<br>18+1n | Date of<br>examination:<br>2015-11-17 | Sex:<br>Male | Age:<br>37 |
|-----------------------|-----------------------------------------|--------------------------------|-------------------------|---------------------------------------|--------------|------------|

Left inguinal tumor specimen.

**Top table:**

Specimen type: left inguinal tumor specimen.

Anatomical site of the tumor: left inguinal

Depth of tumor location: Subcutaneous fat and muscles

Primary or recurrent: Recurrent.

Histological type (WHO classification): Spindle cell tumor. Combining microscopic morphology and medical history consider biphasic Synovial sarcoma first. Immunohistochemical test is being added.

ICD-0 code:9043/3

Histological grading (FNCLCC): G3

Tumor size: 9.5\*6\*6cm

Necrosis: none

Invasion of blood vessels: (-). Invasion of nerves:(-).

Cutting edge status:

Both short axis cut edges (1.5cm and 5.5cm from the tumor, respectively): (-)

Immediately adjacent to the tumor): (Partial margin+)

One side is adjacent to the long axis cutting edge.

Another side is 1.5cm from long axis cut edges: (-)

Surface cutting edge distance from tumor: 3.0cm (-)

Base cut edge distance from tumor:<1.0cm (-)

The specimen is under Immunohistochemical test and molecular pathology test results to confirm.

Additional report:

left inguinal biphasic Synovial sarcoma.

Immunohistochemical marker results (HI15-120175):

Tumor cell: AE1/AE3(+), CAM5.2(+), EMA(+), CD99(weak+), CD99(+), BCL-2(+), calponin(+), CD34(-), Ki67(30%+).

Molecular pathology test results (MP2015-07113): FISH method testing t(18q11.2)(SYT): (+).

Presence of SYT gene-associated ectopic. (>80% Red-green segregated signals were seen in tumor cells)

**Bottom table:**

Items sent for testing: SYT quality control: Sample size: appropriate.

Signal: qualified

Control subjects: Conformity test results: FISH method testing t(18q11.2)(SYT): (+). Presence of SYT gene-associated ectopic. (>80% Red-green segregated signals were seen in tumor cells)

Description of lesion: Left thigh spindle cell sarcoma (original pathology number:2015-46150B)

### Patient ID: No.4:

复旦大学附属肿瘤医院病理报告

报告编号: 2015-54477

|                                                                                                                                                                                                                                                                                                                                   |            |          |            |           |     |      |            |            |
|-----------------------------------------------------------------------------------------------------------------------------------------------------------------------------------------------------------------------------------------------------------------------------------------------------------------------------------|------------|----------|------------|-----------|-----|------|------------|------------|
| 350951                                                                                                                                                                                                                                                                                                                            | 科室:<br>性别: | 胸外科<br>女 | 病区:<br>年龄: | 五病区<br>29 | 床号: | 553n | 检查日期       | 2016/01/14 |
| 左下肺肿块切除标本<br>右大腿内侧滑膜肉瘤复发术后化疗后肺转移                                                                                                                                                                                                                                                                                                  |            |          |            |           |     |      |            |            |
| 标本类型:左下肺肿块切除标本<br>肿瘤的解剖部位:左下肺<br>肿瘤的硬度:/<br>肿瘤来源:转移性<br>组织学类型(WHO分类):滑膜肉瘤,双相型(synovial sarcoma, biphasic subtype)<br>组织学分级(PNCL):G3<br>肿瘤大小:2.0*2.0*1.3cm.<br>肿瘤性坏死:(-)<br>脉管侵犯:(-)<br>神经侵犯:(-)<br>切缘情况:(-)<br>淋巴结转移情况:/<br>其他:【补充报告】<br>免疫组化结果(HI6-00175),<br>瘤细胞:AE1/AE3(+), CAM5.2(+), CD99(+), BCL-2(+), CD34(-), Ki-67(60%+) |            |          |            |           |     |      |            |            |
| 报告医生:                                                                                                                                                                                                                                                                                                                             |            |          |            |           | 杨立  |      | 报告日期:      |            |
| 复诊医生:                                                                                                                                                                                                                                                                                                                             |            |          |            |           | 刘锦硕 |      | 复诊日期:      |            |
|                                                                                                                                                                                                                                                                                                                                   |            |          |            |           |     |      | 2016/01/14 |            |
|                                                                                                                                                                                                                                                                                                                                   |            |          |            |           |     |      | 2016/01/14 |            |

## 复旦大学附属肿瘤医院病理报告

报告编号: 2013-30231

|                                                                                                                                                                                                                                                                                                                                                                           |            |          |            |            |                |           |                |                          |
|---------------------------------------------------------------------------------------------------------------------------------------------------------------------------------------------------------------------------------------------------------------------------------------------------------------------------------------------------------------------------|------------|----------|------------|------------|----------------|-----------|----------------|--------------------------|
| 350951                                                                                                                                                                                                                                                                                                                                                                    | 科室:<br>性别: | 康外科<br>女 | 病区:<br>年龄: | 十二病区<br>27 | 床号:            | 1217n     | 检查日期           | 2013/09/13               |
| <p>右大腿内侧肿物广切术+部分骨皮质切除标本<br/>右大腿内侧内瘤术后复发</p> <p>1、(右大腿内侧)梭形细胞内瘤，结合病史及HE形态，符合滑膜肉瘤复发，肿瘤大小：2.5*2.2*1.8cm，标本两长轴切缘、两短轴切缘及基底切缘未见肿瘤累及（肿瘤距长轴切缘5cm及7.6cm，距表面2.1cm，距基底6.5cm，距一侧短轴0.8cm，另一侧短轴1cm）。</p> <p>2、(另送骨皮质)未见肿瘤累及。</p> <p>附分子病理（MP13-4131），FISH检测t（18q11.2）（SYT），大部分肿瘤细胞中有一个等位基因绿色信号丢失，提示有SYT基因N端缺失，倾向为阳性，即有SYT基因相关易位。</p> <p>注：分子病理支持滑膜肉瘤的诊断。</p> <p>注：本例正加做分子病理检测进一步证实。</p> |            |          |            |            |                |           |                |                          |
|                                                                                                                                                                                                                                                                                                                                                                           |            |          |            |            | 报告医生:<br>复诊医生: | 沈旭霞<br>王坚 | 报告日期:<br>复诊日期: | 2013/09/13<br>2013/09/13 |

Translation: (Chinese -> English)

|                       |                                     |                            |                        |                                       |                |            |
|-----------------------|-------------------------------------|----------------------------|------------------------|---------------------------------------|----------------|------------|
| Patient ID:<br>350951 | Departments:<br>Cerebral<br>surgery | Inpatient<br>ward:<br>Five | Bed<br>number:<br>553n | Date of<br>examination:<br>2016-01-14 | Sex:<br>Female | Age:<br>29 |
|-----------------------|-------------------------------------|----------------------------|------------------------|---------------------------------------|----------------|------------|

Lower left pneumonectomy specimen.

**Top table:**

Specimen type: Lower left pneumonectomy specimen.

Right thigh lateral synovial sarcoma metastasis to the lower left lung.

Anatomical site of the tumor: Lower left lung

Depth of tumor location: /

Primary or recurrent or metastasis: metastasis

Histological type (WHO classification): Biphasic Synovial sarcoma

Histological grading (FNCLCC): G3

Tumor size: 2.0\*2.0\*1.3cm

Necrosis: (-).

Invasion of blood vessels: (-).

Invasion of nerves:(-).

Cutting edge status:(-).

Lymph node metastasis:(-)

Additional report:

Immunohistochemical test (HI16-00176) :

Tumor cell: AE1/AE3(+), CAM5.2(+), CD99(+) , BCL-2(+), calponin(+), CD34(+) ,

Ki67(60%+).

**Bottom table:**

1. Right thigh lateral spindle cell sarcoma. Combining the history and HE test, confirm synovial sarcoma recurrence. Tumor size: 2.5\*2.2\*1.8cm. Both long and short axis cut edges and base cut edges are invaded by sarcoma. (tumor to long axis cut edges is 5cm and 7.6cm and is 0.8cm and 1cm to the short axis cut edges. The tumor is 2.1cm to the surface cut edge and 6.5cm to the base cut edge.)
2. The cortical bone is not invaded.  
Molecular pathology test results (MP13-4131): FISH method testing t(18q11.2)(SYT): The majority of the tumor cells present one allele lost its green signal, which means the presence of SYT gene-associated ectopic.  
The molecular pathology supports the diagnosis of synovial sarcoma.

**Patient ID: No.5:**

复旦大学附属肿瘤医院病理报告

报告编号: 2017-29487

|                                                                                                                                                                                                                                                    |            |             |            |           |     |      |       |            |
|----------------------------------------------------------------------------------------------------------------------------------------------------------------------------------------------------------------------------------------------------|------------|-------------|------------|-----------|-----|------|-------|------------|
| 531571                                                                                                                                                                                                                                             | 科室:<br>性别: | 骨软组织外科<br>女 | 病区:<br>年龄: | 六病区<br>59 | 床号: | 665n | 检查日期  | 2017/07/04 |
| 右髌骨肿瘤切除标本<br>右髌骨占位                                                                                                                                                                                                                                 |            |             |            |           |     |      |       |            |
| 标本类型:右髌骨肿瘤切除标本<br>肿瘤的解剖部位:髌骨<br>肿瘤的起源:肌肉至骨髓腔<br>肿瘤来源:原发性<br>组织学类型(WHO分类):滑膜肉瘤(synovial sarcoma)<br>组织学分级(FNCLCC):G3<br>肿瘤大小:5.5*4.5*3.5cm<br>肿瘤性坏死:(+)<br>脉管侵犯:(-)<br>神经侵犯:(-)<br>切缘情况:肌肉切缘:(-);<br>血管切缘:(-);<br>另送(右髌骨断端):(-)<br>淋巴转移情况:/<br>其他:/ |            |             |            |           |     |      |       |            |
| 报告医生:                                                                                                                                                                                                                                              |            |             |            |           |     | 胡舜   | 报告日期: | 2017/07/04 |
| 复诊医生:                                                                                                                                                                                                                                              |            |             |            |           |     | 喻林   | 复诊日期: | 2017/07/04 |

复旦大学附属肿瘤医院病理报告

报告编号: 2017-26253

|                                                                                                                |            |            |            |  |     |    |       |            |
|----------------------------------------------------------------------------------------------------------------|------------|------------|------------|--|-----|----|-------|------------|
| 310225195710110823                                                                                             | 科室:<br>性别: | 肝胆胰肿瘤<br>女 | 病区:<br>年龄: |  | 床号: |    | 检查日期  | 2017/06/28 |
| 右髌骨CMB标本<br>右髌骨占位                                                                                              |            |            |            |  |     |    |       |            |
| (右髌骨, CMB)间叶源性肿瘤, 可试行免疫组化和分子检测进一步诊断, 请至病理科办理相关手续。                                                              |            |            |            |  |     |    |       |            |
| 补充报告:<br>(右髌骨, CMB)滑膜肉瘤(synovial sarcoma)。                                                                     |            |            |            |  |     |    |       |            |
| 免疫组化结果(HI17-12053):<br>AE1/AE3(强+), EMA(-), CD99(+), Bcl-2(+), Calponin(+), CD34(-), Syn(-), Ki-67(+, 10-15%)。 |            |            |            |  |     |    |       |            |
| 分子检测结果(MP2017-07195):<br>FISH法检t(18q11.2)(SYT): (+), 即有SYT基因相关易位。<br>(注: >50%肿瘤细胞内可见红绿分离信号。)                   |            |            |            |  |     |    |       |            |
| 报告医生:                                                                                                          |            |            |            |  |     | 胡舜 | 报告日期: | 2017/06/28 |
| 复诊医生:                                                                                                          |            |            |            |  |     | 喻林 | 复诊日期: | 2017/06/28 |

Translation: (Chinese -> English)

|                                                                                                                                                                                                                                                                                                                                                                                                                                                                                                                                       |                                                   |                        |                     |                                    |                |            |
|---------------------------------------------------------------------------------------------------------------------------------------------------------------------------------------------------------------------------------------------------------------------------------------------------------------------------------------------------------------------------------------------------------------------------------------------------------------------------------------------------------------------------------------|---------------------------------------------------|------------------------|---------------------|------------------------------------|----------------|------------|
| Patient ID:<br>531571                                                                                                                                                                                                                                                                                                                                                                                                                                                                                                                 | Departments:<br>Musculoskeletal<br>Cancer Surgery | Inpatient ward:<br>Six | Bed number:<br>665n | Date of examination:<br>2017-07-04 | Sex:<br>Female | Age:<br>59 |
| Right iliac bone tumor specimen.                                                                                                                                                                                                                                                                                                                                                                                                                                                                                                      |                                                   |                        |                     |                                    |                |            |
| <b>Top table:</b><br>Specimen type: Right iliac bone tumor specimen.<br>Anatomical site of the tumor: Iliac bone<br>Depth of tumor location: Muscles and bone marrow<br>Primary or recurrent: Primary<br>Histological type (WHO classification): Synovial sarcoma<br>Histological grading (FNCLCC): G3<br>Tumor size: 5.5*4.5*3.5cm<br>Necrosis: (+)<br>Invasion of blood vessels: (-). Invasion of nerves:(-).<br>Muscle cutting edge condition:(-)<br>Bone cutting edge condition: (-)<br>Lymph node metastasis: (-)<br>Others: (-) |                                                   |                        |                     |                                    |                |            |
| <b>Middle table:</b><br>Additional report:<br>Right iliac bone (CNB) Synovial sarcoma.<br>Immunohistochemical marker results (HI17-12053):<br>AE1/AE3(week+), EMA(-),CD99(+), CD99(+), BCL-2(+), Calponin(+), CD34(- ) , Syn(-),Ki67(+,10-15%).<br>Molecular pathology test results (MP2017-07195): FISH method testing t(18q11.2)(SYT): (+).<br>Presence of SYT gene-associated ectopic. (>50% Red-green segregated signals were seen in tumor cells)                                                                                |                                                   |                        |                     |                                    |                |            |
| <b>Bottom table:</b><br>Original pathology number:2017-26253A<br>Testing programs: SYT<br>Materials sent for examination: wax block                                                                                                                                                                                                                                                                                                                                                                                                   |                                                   |                        |                     |                                    |                |            |



|                                                                                                                                                                                                                                                                                                                                                                                                                                                                                                                        |
|------------------------------------------------------------------------------------------------------------------------------------------------------------------------------------------------------------------------------------------------------------------------------------------------------------------------------------------------------------------------------------------------------------------------------------------------------------------------------------------------------------------------|
| All the short axis cut edges, long axis cut edges, and base cut edges are negative.                                                                                                                                                                                                                                                                                                                                                                                                                                    |
| <b>Middle table:</b><br>Pathology consultation opinion: foot synovial sarcoma, spindle cell type<br>Immunohistochemical marker results (HI17-18366):<br>Tumor cell: CD99(+), BCL-2(+), AE1/AE3(-), EMA(+), SMA(-), Calponin(-), CD34(-), s-100(-), Ki67(+, approximatly 75%).<br>Molecular pathology test results (MP2017-11010): FISH method testing t(18q11.2) (SYT): (+). Presence of SYT gene-associated ectopic. (>50% Red-green segregated signals were seen in tumor cells)                                     |
| <b>Bottom table:</b><br>Original pathology number: F17-028<br>Testing programs: SYT<br>Materials sent for examination: Blank slices<br>Testing method: FISH<br>Reagent Information: Vysis LSI SS18 Probe<br>Description of lesion: Right foot lump<br>Quality control: Sample size: appropriate.<br>Signal: qualified<br>Control subjects: qualified<br>Testing results: FISH method test t(18q11.2) (SYT): (+). Presence of SYT gene-associated ectopic. (>50% Red-green segregated signals were seen in tumor cells) |

Patient ID: No.7:

|                                                                                                                                                                                                                                                                                                                                                                                                                                                                                                                          |            |             |            |                |            |                  |                          |
|--------------------------------------------------------------------------------------------------------------------------------------------------------------------------------------------------------------------------------------------------------------------------------------------------------------------------------------------------------------------------------------------------------------------------------------------------------------------------------------------------------------------------|------------|-------------|------------|----------------|------------|------------------|--------------------------|
| 复旦大学附属肿瘤医院病理报告                                                                                                                                                                                                                                                                                                                                                                                                                                                                                                           |            |             |            |                |            |                  |                          |
|                                                                                                                                                                                                                                                                                                                                                                                                                                                                                                                          |            |             |            |                |            | 报告编号: 2017-60748 |                          |
| 546125                                                                                                                                                                                                                                                                                                                                                                                                                                                                                                                   | 科室:<br>性别: | 骨科组织外科<br>女 | 病区:<br>年龄: | 六病区<br>20      | 床号:        | 666n             | 检查日期<br>2017/12/29       |
| 左颈部骨骼肌软组织肿瘤切除标本<br>左侧项背部肿物                                                                                                                                                                                                                                                                                                                                                                                                                                                                                               |            |             |            |                |            |                  |                          |
| 标本类型:左颈部骨骼肌软组织肿瘤切除标本【补充报告】<br>肿瘤的解剖部位: 左颈部<br>肿瘤的类型: 肌肉<br>肿瘤来源: 原发性<br>组织学类型 (WHO分类): 结合光镜形态和免疫组化结果, 符合滑膜肉瘤 (synovial sarcoma)<br>组织学分级 (FNCLCC): G3<br>肿瘤大小: 8*5*4cm<br>肿瘤性坏死: (-)<br>肺管侵犯: (+)<br>神经侵犯: (-)<br>切缘情况: 两侧长轴切缘 (分别距高肿瘤4cm和1cm): (-);<br>两侧短轴切缘 (分别距高肿瘤3cm和4cm): (-);<br>皮肤切缘 (距高肿瘤1.5cm): (-);<br>基底切缘 (距高肿瘤0.5cm): (-);<br>淋巴结转移情况: /<br>其他: 免疫组化 (HI17-27339)<br>瘤细胞: AE1/AE3 (部分+), EMA (部分+), Bcl-2 (+), CD99 (+), CD34 (-), Desmin (-), SMA (-), STAT6 (-), Ki-67 (40%+)<br>备注: 建议必要时重复分子病理检查进一步证实。 |            |             |            |                |            |                  |                          |
|                                                                                                                                                                                                                                                                                                                                                                                                                                                                                                                          |            |             |            | 报告医生:<br>复诊医生: | 周华山<br>刘锦硕 | 报告日期:<br>复诊日期:   | 2017/12/29<br>2017/12/29 |

报告编号: T2017-32512

病理会诊咨询意见: (左肩背部, CNB) 梭形细胞恶性肿瘤, 结合光镜形态和免疫组化结果, 滑膜肉瘤 (synovial sarcoma) 不能除外。建议将肿块完整切除后进一步明确诊断。

免疫组化结果 (HI17-25449):  
 AE1/AE3 (-), EMA (-), CD99 (+), Bcl-2 (+), CAM5.2 (-), Calponin (++) , Ki-67+ (30-40%)。

分子检测结果 (MP2017-15184):

FISH法检测: (18q11.2) (SYT): (-), 即无SYT基因相关易位。

(注: <5%肿瘤细胞内可见红绿分离信号。); 送检切片编号: 1、B201705641 数目: HE\*1 US\*15 2、数目: 3、数目: 4、数目: ;

报告医生

报告日期: 2017/12/13

报告日期: 2017/12/13  
复诊日期: 2017/12/13

报告编号: MP2017-15184

原病理号:201705641

检测项目:SYT

送检材料:白片

检测方法:FISH

试剂信息: Vysis LSI SS18 Probe  
病变描述: (左肩部肿物)

质量控制:样本量,合适

信号:合格

对照:合格

检测结果:FISH法检测t(18q11.2)(SYT):(-),即无SYT基因相关易位。  
(注:骨髓细胞中可见红绿分象信号。)

(注: <5%肿瘤细胞内可见红绿分离信号。)

报告医生: 柏乾明

报告日期: 2017/12/06

复诊医生:

复诊日期: 2017/12/06

Left neck musculoskeletal tumor specimen.

**Top table:**

Specimen type: left neck musculoskeletal tumor specimen.

Anatomical site of the tumor: left neck

Depth of tumor location:Muscles

Primary or recurrent:Primary

Histological type (WHO classification): Spindle cell tumor. Combining microscopic morphology and medical history consistent with synovial sarcoma.

Histological grading (FNCLCC): G3

Tumor size: 6\*5\*4cm

Necrosis: (-)

Invasion of blood vessels: (+). Invasion of nerves:(-).

Cutting edge status:

Both long axis cut edges (4cm and 1cm from the tumor, respectively): (-)

Both short axis cut edges( 3cm and 4cm from the tumor, respectively): (-)

Surface cutting edge distance from tumor: 1.6cm (-)

Base cut edge distance from tumor:0.5cm (-)

Lymph node metastasis: /

Others: Immunohistochemical marker results (HI17-27339):

Tumor cell:AE1/AE3 (partially,+), EMA(partially,+), Bcl-2(+), CD99(+), CD34(-), Desmin(-), SMA(-),STAT6(-), Ki67(40%+).

Pathology consultation opinion: Left neck (CNB) spindle cell malignancy sarcoma, combining microscopy results and Immunohistochemical results: synovial sarcoma cannot be ruled out. Further diagnosis is recommended after the complete removal of the mass.

No presence of SYT gene-associated ectopic. (<5% Red-green segregated signals were seen in tumor cells)

Testing results: FISH method test t(18q11.2) (SYT): (-). No presence of SYT gene-associated ectopic. (<5% Red-green segregated signals were seen in tumor cells)

2018/02/12

Translation: (Chinese -> English)

|                                                                                                                                                                                                                                                                                                                                                                                                                                                                                                                           |                    |                       |                   |                                    |              |            |
|---------------------------------------------------------------------------------------------------------------------------------------------------------------------------------------------------------------------------------------------------------------------------------------------------------------------------------------------------------------------------------------------------------------------------------------------------------------------------------------------------------------------------|--------------------|-----------------------|-------------------|------------------------------------|--------------|------------|
| Patient ID:<br>3205031991207103X                                                                                                                                                                                                                                                                                                                                                                                                                                                                                          | Departments:<br>NA | Inpatient ward:<br>NA | Bed number:<br>NA | Date of examination:<br>2018-02-09 | Sex:<br>Male | Age:<br>27 |
| <b>Top table:</b><br>Pathology consultation opinion: Right shank spindle cell type synovial sarcoma(Monophasic synovial sarcoma), tumor size:7*6*2cm<br>Immunohistochemical marker results (HI18-02837):<br>AE1/AE3(-), BCL-2(+), Calponin(partially+), CD99(+), EMA(+)<br>Molecular pathology test results (MP18-2164): FISH method testing t(18q11.2) (SYT): (+),Presence of SYT gene-associated ectopic. (>50% Red-green segregated signals were seen in tumor cells)                                                  |                    |                       |                   |                                    |              |            |
| <b>Bottom table:</b><br>Original pathology number: HI18-2837<br>Testing programs: SYT<br>Materials sent for examination: Blank slices<br>Testing method: FISH<br>Reagent Information: Vysis LSI SS18 Probe<br>Description of lesion: right shank lump<br>Quality control: Sample size: appropriate.<br>Signal: qualified<br>Control subjects: qualified<br>Testing results: FISH method test t(18q11.2) (SYT): (+). Presence of SYT gene-associated ectopic. (>50% Red-green segregated signals were seen in tumor cells) |                    |                       |                   |                                    |              |            |

Patient ID: No.9:

|                                                                                                                                                                                                                    |            |             |                |     |                |                          |
|--------------------------------------------------------------------------------------------------------------------------------------------------------------------------------------------------------------------|------------|-------------|----------------|-----|----------------|--------------------------|
| 复旦大学附属肿瘤医院病理报告                                                                                                                                                                                                     |            |             |                |     |                |                          |
| 报告编号: MP2018-11432                                                                                                                                                                                                 |            |             |                |     |                |                          |
| 566168                                                                                                                                                                                                             | 科室:<br>性别: | 骨科组织外科<br>男 | 病区:<br>年龄:     | 40  | 床号:            | 检查日期<br>2018/07/11       |
| 右小腿胫骨软组织肿块切除标本<br>右小腿胫骨后肌占位                                                                                                                                                                                        |            |             |                |     |                |                          |
| 病理编号:2018-29776D<br>检测项目:SYT<br>送检材料:蜡块<br>检测方法:FISH<br>试剂信息:Vysis LSI SS18 Probe<br>病史描述:(右小腿肿物)<br>质量控制:样本量, 合适<br>信号, 合格<br>对照, 合格<br>检测结果:FISH法检测t(18q11.2)(SYT): (+), 即有SYT基因相关易位。<br>(注: >50%肿瘤细胞内可见红绿分离信号。) |            |             |                |     |                |                          |
|                                                                                                                                                                                                                    |            |             | 报告医生:<br>复诊医生: | 柏乾明 | 报告日期:<br>复诊日期: | 2018/07/11<br>2018/07/11 |

报告编号: 2018-297

|                                                                                                                                                                                                                                                                                                      |            |              |            |            |     |       |                  |            |
|------------------------------------------------------------------------------------------------------------------------------------------------------------------------------------------------------------------------------------------------------------------------------------------------------|------------|--------------|------------|------------|-----|-------|------------------|------------|
| 566168                                                                                                                                                                                                                                                                                               | 科室:<br>性别: | 骨科/组织外科<br>男 | 病区:<br>年龄: | 十二病区<br>40 | 床号: | 1211n | 检查日期             | 2018/07/10 |
| 右小腿骨骨肉瘤组织肿块切除标本<br>右小腿胫骨后肌占位                                                                                                                                                                                                                                                                         |            |              |            |            |     |       |                  |            |
| 标本类型:右小腿骨骨肉瘤组织<br>肿瘤的解剖部位:右小腿<br>肿瘤的深度:肌肉<br>肿瘤来源:原发性<br>组织学类型(WHO分类):梭形细胞滑膜肉瘤<br>组织学分级(FNCLCC):G3<br>肿瘤大小:8*6*4cm<br>肿瘤性坏死:(-)<br>脉管侵犯:(-)<br>神经侵犯:(-)<br>切缘情况:(两侧长轴切缘(分别距离肿瘤10cm和0.5cm); 两侧短轴切缘(分别距离肿瘤4.5cm和0.5cm); (-); 表面切缘(距离肿瘤0.5cm); (-); 基底切缘(距离肿瘤0.5cm); (-); 淋巴结转移情况:/;<br>其他:送检血管旁肿块见肿瘤组织 |            |              |            |            |     |       |                  |            |
| 备注:免疫组化(HI18-15724); AE1/AE3(+), Bcl-2(+), Calponin(+), CD99(+), EMA(+), Ki-67(30%)                                                                                                                                                                                                                  |            |              |            |            |     |       |                  |            |
| 分子检测(MP18-11432); FISH检测:(18q11.2)(SYT)(+), 即有SYT基因相关易位。<br>(注:≥50%肿瘤细胞内可见红绿分信号。)                                                                                                                                                                                                                    |            |              |            |            |     |       |                  |            |
| 报告医生:                                                                                                                                                                                                                                                                                                |            |              |            |            | 侯燕  |       | 报告日期: 2018/07/10 |            |
| 复诊医生:                                                                                                                                                                                                                                                                                                |            |              |            |            | 王坚  |       | 复诊日期: 2018/07/10 |            |

|                                                                                                                                                                                                                                                                                                                                                                                                                                                                                                                                                                                                                     |                                                   |                       |                   |                                    |              |            |
|---------------------------------------------------------------------------------------------------------------------------------------------------------------------------------------------------------------------------------------------------------------------------------------------------------------------------------------------------------------------------------------------------------------------------------------------------------------------------------------------------------------------------------------------------------------------------------------------------------------------|---------------------------------------------------|-----------------------|-------------------|------------------------------------|--------------|------------|
| Patient ID:<br>556168                                                                                                                                                                                                                                                                                                                                                                                                                                                                                                                                                                                               | Departments:<br>Musculoskeletal<br>Cancer Surgery | Inpatient ward:<br>NA | Bed number:<br>NA | Date of examination:<br>2018-07-11 | Sex:<br>Male | Age:<br>40 |
| Right shank musculoskeletal tumor specimen.                                                                                                                                                                                                                                                                                                                                                                                                                                                                                                                                                                         |                                                   |                       |                   |                                    |              |            |
| <b>Top table:</b><br>Original pathology number:2018-29776D<br>Testing programs: SYT<br>Materials sent for examination: wax block<br>Testing method: FISH<br>Reagent Information: Vysis LSI SS18 Probe<br>Description of lesion: right shank lump<br>Quality control: Sample size: appropriate.<br>Signal: qualified<br>Control subjects: qualified<br>Testing results: FISH method test t(18q11.2) (SYT): (+). Presence of SYT gene-associated ectopic. (>50% Red-green segregated signals were seen in tumor cells.)                                                                                               |                                                   |                       |                   |                                    |              |            |
| <b>Bottom table:</b><br>Specimen type: Right shank musculoskeletal tumor specimen.<br>Anatomical site of the tumor: Right shank<br>Depth of tumor location: Muscles<br>Primary or recurrent: Primary<br>Histological type (WHO classification): Spindle cell type synovial sarcoma<br>Histological grading (FNCLCC): G3<br>Tumor size: 8*6*4cm<br>Necrosis: (-)<br>Invasion of blood vessels: (-). Invasion of nerves:(-).<br>Cutting edge status:<br>Both long axis cut edges (10cm and 0.5cm from the tumor, respectively): (-)<br>Both short axis cut edges ( 4.5cm and 0.5cm from the tumor, respectively): (-) |                                                   |                       |                   |                                    |              |            |

Surface cutting edge distance from tumor: 0.5cm (-)  
Base cut edge distance from tumor:0.5cm (-)  
Lymph node metastasis: /  
Others: Tumor tissue seen next to the vessels of the specimen  
Immunohistochemical marker results (HI18-15724):  
Tumor cell:AE1/AE3 (+), Bcl-2(+), Calponin(+), CD99(+), EMA(+), Ki67(30%+).  
Molecular pathology test results (MP18-11432): FISH method testing t(18q11.2) (SYT): (+).  
Presence of SYT gene-associated ectopic. (>50% Red-green segregated signals were seen in tumor cells)

Patient ID: No.10:

| 复旦大学附属肿瘤医院病理报告                                                                                                                                                                                                                                                                                                                                                                                                                                                                                                                                                                                                                                                                                                                                                                |            |             |            |            |           |       |                          | 报告编号: 2018-47616 |
|-------------------------------------------------------------------------------------------------------------------------------------------------------------------------------------------------------------------------------------------------------------------------------------------------------------------------------------------------------------------------------------------------------------------------------------------------------------------------------------------------------------------------------------------------------------------------------------------------------------------------------------------------------------------------------------------------------------------------------------------------------------------------------|------------|-------------|------------|------------|-----------|-------|--------------------------|------------------|
| 572616                                                                                                                                                                                                                                                                                                                                                                                                                                                                                                                                                                                                                                                                                                                                                                        | 科室:<br>性别: | 骨科组织外科<br>女 | 病区:<br>年龄: | 十八病区<br>71 | 床号:       | 18+5n | 检查日期                     | 2018/10/18       |
| 左大腿内侧肿瘤局部广泛切除标本<br>左大腿内侧肿瘤                                                                                                                                                                                                                                                                                                                                                                                                                                                                                                                                                                                                                                                                                                                                                    |            |             |            |            |           |       |                          |                  |
| 标本类型:左大腿内侧肿瘤局部广泛切除标本<br>肿瘤的解剖部位: 左大腿内侧<br>肿瘤的深度:肌肉<br>肿瘤来源:原发性<br>组织学类型 (WHO分类):梭形细胞恶性肿瘤, 需行免疫组化和分子检测辅助诊断, 请至病理科办理付费手续。<br>组织学分级 (FNCLCC):/<br>肿瘤大小:9*6*3cm<br>肿瘤性坏死:(+)<br>脉管侵犯:(-)<br>神经侵犯:(-)<br>切缘情况:两侧长轴切缘 (分别距离肿瘤9cm和5cm): (-) ;<br>两侧短轴切缘 (分别距离肿瘤8cm和2cm): (-) ;<br>皮肤切缘 (距离肿瘤2.5cm): (-) ;<br>基底切缘 (距离肿瘤0.3cm): (-) ;<br>淋巴结转移情况:补充报告: (左大腿) 差分化滑膜肉瘤 (poorly-differentiated synovial sarcoma) 。<br>免疫组化(HI18-24123), 肿瘤细胞AE1/AE3 (-), EMA (少+), CD99 (+), Bcl-2 (+), Calponin (+), CD117 (-), Syn (少+), CgA (-), P11-1 (+), H3K27ME3 (+), NKX2.2 (-), S-100 (-) 。<br>分子检测结果 (MP2018-16812,16813) :<br>其他:(1)FISH法检测:t (18q11.2) (SYT) : (+) , 即有SYT基因相关易位。<br>(注: >50%肿瘤细胞内可见红绿分离信号。)<br>(2)FISH法检测:t (22q12) (EWSR1) : (-) , 即无EWSR1基因相关易位。<br>(注: <5%肿瘤细胞内可见红绿分离信号) |            |             |            |            |           |       |                          |                  |
| 报告医生:<br>复诊医生:                                                                                                                                                                                                                                                                                                                                                                                                                                                                                                                                                                                                                                                                                                                                                                |            |             |            |            | 谢南子<br>喻林 |       | 报告日期:<br>复诊日期:           |                  |
|                                                                                                                                                                                                                                                                                                                                                                                                                                                                                                                                                                                                                                                                                                                                                                               |            |             |            |            |           |       | 2018/10/18<br>2018/10/18 |                  |

| 复旦大学附属肿瘤医院病理报告                                                                                                                                                                                                         |            |             |            |    | 报告编号: MP2018-16813 |                |                          |
|------------------------------------------------------------------------------------------------------------------------------------------------------------------------------------------------------------------------|------------|-------------|------------|----|--------------------|----------------|--------------------------|
| 572616                                                                                                                                                                                                                 | 科室:<br>性别: | 骨软组织外科<br>女 | 病区:<br>年龄: | 71 | 床号:                | 检查日期           | 2018/10/10               |
| 左大腿内侧肿瘤局部广泛切除标本<br>左大腿内侧肿瘤                                                                                                                                                                                             |            |             |            |    |                    |                |                          |
| 原病理号:2018-47616M<br>检测项目:EWSR1<br>送检材料:蜡块<br>检测方法:FISH<br>试剂信息:Vysis LSI EWSR1 Probe<br>病变描述:(左大腿肿瘤)<br>质量控制:样本量, 合适<br>信号, 合格<br>对照, 合格<br>检测结果:FISH法检测:t(22q12)(EWSR1): (-), 即无EWSR1基因相关易位。<br>(注: <5%肿瘤细胞内可见红绿分离信号) |            |             |            |    |                    |                |                          |
| 报告医生:<br>复诊医生:                                                                                                                                                                                                         |            |             |            |    | 柏乾明                | 报告日期:<br>复诊日期: | 2018/10/10<br>2018/10/10 |

| 复旦大学附属肿瘤医院病理报告                                                                                                                                                                                               |            |             |            |    |     | 报告编号：MP2018-16812 |                          |
|--------------------------------------------------------------------------------------------------------------------------------------------------------------------------------------------------------------|------------|-------------|------------|----|-----|-------------------|--------------------------|
| 572616                                                                                                                                                                                                       | 科室：<br>性别： | 骨软组织外科<br>女 | 病区：<br>年龄： | T1 | 床号： | 检查日期              | 2018/10/10               |
| 左大腿内侧肿瘤局部广泛切除标本<br>左大腿内侧肿瘤                                                                                                                                                                                   |            |             |            |    |     |                   |                          |
| 原病理号:2018-47616M<br>检测项目:SYT<br>送检材料:蜡块<br>检测方法:FISH<br>试剂信息:Vysis LSI SY18 Probe<br>病变描述:（左大腿肿物）<br>质量控制:样本量，合适<br>信号，合格<br>对照，合格<br>检测结果:FISH法检测:（18q11.2）（SYT）:（+），即有SYT基因相关易位。<br>（注：>50%肿瘤细胞内可见红绿分离信号。） |            |             |            |    |     |                   |                          |
| 报告医生：<br>复诊医生：                                                                                                                                                                                               |            |             |            |    | 柏乾明 | 报告日期：<br>复诊日期：    | 2018/10/10<br>2018/10/10 |

|                                                                                                                                                                                                                                                                                                                                                                                                                                                                                                                                                                                                                                                                                                                                                                                                                                                                                                                                                                                                                                                                                                                                                                                                                                                                                                                                                                                                                                                     |                                             |                          |                   |                                 |             |         |
|-----------------------------------------------------------------------------------------------------------------------------------------------------------------------------------------------------------------------------------------------------------------------------------------------------------------------------------------------------------------------------------------------------------------------------------------------------------------------------------------------------------------------------------------------------------------------------------------------------------------------------------------------------------------------------------------------------------------------------------------------------------------------------------------------------------------------------------------------------------------------------------------------------------------------------------------------------------------------------------------------------------------------------------------------------------------------------------------------------------------------------------------------------------------------------------------------------------------------------------------------------------------------------------------------------------------------------------------------------------------------------------------------------------------------------------------------------|---------------------------------------------|--------------------------|-------------------|---------------------------------|-------------|---------|
| Patient ID: 572616                                                                                                                                                                                                                                                                                                                                                                                                                                                                                                                                                                                                                                                                                                                                                                                                                                                                                                                                                                                                                                                                                                                                                                                                                                                                                                                                                                                                                                  | Departments: Musculoskeletal Cancer Surgery | Inpatient ward: Eighteen | Bed number: 18+5n | Date of examination: 2018-10-18 | Sex: Female | Age: 71 |
| Left thigh tumor specimen.                                                                                                                                                                                                                                                                                                                                                                                                                                                                                                                                                                                                                                                                                                                                                                                                                                                                                                                                                                                                                                                                                                                                                                                                                                                                                                                                                                                                                          |                                             |                          |                   |                                 |             |         |
| <b>Top table:</b><br>Specimen type: left thigh tumor specimen.<br>Anatomical site of the tumor: left thigh<br>Depth of tumor location: Muscles<br>Primary or recurrent: Primary<br>Histological type (WHO classification): Spindle cell malignancy. Immunohistochemistry and molecular tests are required to aid in the diagnosis<br>Histological grading (FNCLCC): /<br>Tumor size: 9*6*3cm<br>Necrosis: (+)<br>Invasion of blood vessels: (-). Invasion of nerves:(-).<br>Cutting edge status:<br>Both long axis cut edges (9cm and 5cm from the tumor, respectively): (-)<br>Both short axis cut edges( 8cm and 2cm from the tumor, respectively): (-)<br>Surface cutting edge distance from tumor: 2.5cm (-)<br>Base cut edge distance from tumor:0.3cm (-)<br>Lymph node metastasis: /<br>Supplementary report: left thigh poorly-differentiated synovial sarcoma<br>Immunohistochemical marker results (HI18-24123):<br>Tumor cell:AE1/AE3 (partially,-), EMA(poorly+), CD99(+), Bcl-2(+), Calponin(+), CD117(-), Syn(poorly,+), CgA(-), Fli-1(+), H3K27ME3(+), NKX2.2(-), S100(-).<br>Molecular pathology test results (MP2018-16812,16813): FISH method testing<br>(1) t(18q11.2) (SYT): (+), Presence of SYT gene-associated ectopic. (>50% Red-green segregated signals were seen in tumor cells)<br>(2) t(22q12) (EWSR1): (-), No presence of EWSR1 gene-associated ectopic. (<5% Red-green segregated signals were seen in tumor cells) |                                             |                          |                   |                                 |             |         |
| <b>Middle table:</b><br>Original pathology number:2018-47616M<br>Testing programs: EWSR1<br>Materials sent for examination: wax block<br>Testing method: FISH<br>Reagent Information: Vysis LSI EWSR1 Probe<br>Description of lesion: Left thigh lump<br>Quality control: Sample size: appropriate.<br>Signal: qualified<br>Control subjects: qualified<br>Testing results: FISH method test t(22q12) (EWSR1): (-), No presence of SYT gene-associated                                                                                                                                                                                                                                                                                                                                                                                                                                                                                                                                                                                                                                                                                                                                                                                                                                                                                                                                                                                              |                                             |                          |                   |                                 |             |         |

ectopic. (<5% Red-green segregated signals were seen in tumor cells)

**Bottom table:**

Original pathology number: MP2018-16812

Testing programs: SYT

Materials sent for examination: wax block

Testing method: FISH

Reagent Information: Vysis LSI SS18 Probe

Description of lesion: left thigh lump

Quality control: Sample size: appropriate.

Signal: qualified

Control subjects: qualified

Testing results: FISH method test t(18q11.2) (SYT): (+). Presence of SYT gene-associated ectopic. (>50% Red-green segregated signals were seen in tumor cells)
